# Supplementary material
Source: HighWire-hosted journal article supplement (https://jnm.snmjournals.org/highwire/filestream/94043/field_highwire_adjunct_files/0/63321_Supplemental_Tables.pdf)
Supplement: 63321_Supplemental_Tables.pdf [file 63321_Supplemental_Tables.pdf]

**Supplemental Table 1. Hypothesis Testing of Mean Differences and Inter-observer Reproducibility of SUV<sub>bw</sub> max for the 20 Most and 20 Least Metabolically Active Lesions**

|            | Mean SUV <sub>bw</sub> max ± Standard Deviation<br>(95% C.I.) |                             | Coefficient of Variation<br>[mean ± standard deviation] |                     | Intraclass Correlation Coefficient<br>(95% C.I., Precision) |                          |
|------------|---------------------------------------------------------------|-----------------------------|---------------------------------------------------------|---------------------|-------------------------------------------------------------|--------------------------|
|            | Pre-treatment Scan                                            | Post-treatment Scan         | Pre-treatment Scan                                      | Post-treatment Scan | Pre-treatment Scan                                          | Post-treatment Scan      |
| Highest 20 | 15.81 ± 5.38<br>(14.61-17.01)                                 | 6.76 ± 4.83*<br>(5.69-7.84) | 7.7 ± 15.8%†                                            | 17.1 ± 25.6%        | 0.86<br>(0.75-0.93, ±9%)                                    | 0.98<br>(0.97-0.99, ±1%) |
| Lowest 20  | 4.32 ± 1.26<br>(4.05-4.59)                                    | 2.51 ± 1.47*<br>(2.19-2.82) | 4.1 ± 6.4%†‡                                            | 22.3 ± 29.7%¥       | 0.94<br>(0.88-0.97, ±5%)                                    | 0.88<br>(0.78-0.94, ±8)  |

\*p < 0.001 for pre-treatment versus post-treatment scan

†p=0.009 and p=0.01 compared to post-treatment scan for the highest 20 and lowest 20, respectively.

‡ No differences in CV of SUV<sub>bw</sub>max for the 20 lesions with the highest versus the lowest metabolic were found within pre-treatment (p=0.82) and post-treatment scans (p=0.28).

**Supplemental Table 2. Hypothesis Testing of Mean Differences and Inter-observer Reproducibility of CT Size Parameters for the 20 Largest and Smallest Lesions**

|                                      | Mean Size ± Standard Deviation<br>(95% C.I.) |                                     | Coefficient of Variation<br>[mean ± standard deviation] |                     | Intraclass Correlation Coefficient<br>(95% C.I., Precision) |                          |
|--------------------------------------|----------------------------------------------|-------------------------------------|---------------------------------------------------------|---------------------|-------------------------------------------------------------|--------------------------|
|                                      | Pre-treatment Scan                           | Post-treatment Scan*                | Pre-treatment Scan                                      | Post-treatment Scan | Pre-treatment Scan                                          | Post-treatment Scan      |
| <b>Longest CT size (RECIST)</b>      |                                              |                                     |                                                         |                     |                                                             |                          |
| Largest 20 (mm)                      | 34.99 ± 11.92<br>(32.43-37.54)               | 28.45 ± 13.34*<br>(2.55-31.34)      | 15.7 ± 25.5%†                                           | 29.6 ± 41.8%        | 0.40<br>(0.18-0.65, ±24)                                    | 0.81<br>(0.65-0.91, ±13) |
| Smallest 20 (mm)                     | 15.85 ± 4.07<br>(14.94-16.76)                | 11.36 ± 6.86*<br>(9.82-12.89)       | 16.1 ± 8.3%†                                            | 42.4 ± 49.0%        | 0.36<br>(0.13-0.62, ±25)                                    | 0.73<br>(0.55-0.87, ±16) |
| <b>Two-dimensional CT size (WHO)</b> |                                              |                                     |                                                         |                     |                                                             |                          |
| Largest 20 (mm <sup>2</sup> )        | 976.06 ± 733.10<br>(815.99-1136.4)           | 731.21 ± 883.30*<br>(534.64-927.77) | 18.9 ± 25.9%†                                           | 44.1 ± 50.1%        | 0.39<br>(0.18-0.64, ±23)                                    | 0.32<br>(0.08-0.60, ±26) |
| Smallest 20 (mm <sup>2</sup> )       | 180.81 ± 85.86<br>(161.70-199.91)            | 123.13 ± 97.04*<br>(101.53-144.72)  | 30.1 ± 15.6%†                                           | 56.9 ± 47.1%        | 0.43<br>(0.21-0.66, ±23)                                    | 0.62<br>(0.41-0.81, ±20) |

\*p ≤ 0.03 for pre-treatment versus post-treatment scans

†p=0.01 for largest 20 and p=0.02 for smallest 20 versus post-treatment for longest CT size; p=0.004 for largest 20 and p=0.001 for smallest 20 for two-dimensional CT size  
For both CT size parameters, no significant differences were found comparing CV for the largest 20 vs. the smallest 20 lesions within pre-treatment and post-treatment scans.
